# Supplementary material for: Synthesis and structural characterisation of an yttrium–alkyl–alkylidene
Source: Royal Society of Chemistry journal article supplement (doi:10.1039/b719633d), 2008-01-01
Supplement: b719633d.pdf [file b719633d.pdf]

## Supplementary Information

### Synthesis and Structural Characterisation of an Yttrium-Alkyl-Alkylidene

Stephen T. Liddle,\* Jonathan McMaster, Jennifer C. Green, Polly L. Arnold

#### Synthesis and Spectroscopy

All manipulations were carried out under anaerobic and anhydrous conditions. Toluene (30 ml) was added to a pre-cooled ( $-78\text{ }^{\circ}\text{C}$ ) mixture of  $[\text{Y}(\text{CH}_2\text{SiMe}_3)_3(\text{THF})_2]$  (1.72 g, 3.48 mmol) and  $\text{H}_2\text{C}(\text{PPh}_2\text{NSiMe}_3)_2$  (1.85 g, 3.48 mmol) and the mixture was allowed to slowly warm to room temperature with stirring over 18 hours. Volatiles were removed *in vacuo* and the resulting pale yellow solid was recrystallised from hexane/toluene (5:2 ml) to afford **1** as colourless crystals. Yield: 1.21 g, 43%. Anal. Calcd for  $\text{C}_{39}\text{H}_{57}\text{N}_2\text{OP}_2\text{Si}_3\text{Y}$ : C, 58.19; H, 7.14; N, 3.48. Found: C, 58.07; H, 7.09; N, 3.51.  $^1\text{H}$  NMR ( $d_6$ -benzene, 298 K):  $\delta$   $-0.18$  (d,  $^2J_{\text{YH}} = 2.88$  Hz, 2H,  $\text{CH}_2\text{Si}$ ),  $0.16$  (s, 18H,  $\text{NSi}(\text{CH}_3)_3$ ),  $0.65$  (s, 9H,  $\text{CH}_2\text{Si}(\text{CH}_3)_3$ ),  $1.43$  (m, 4H,  $\text{OCH}_2\text{CH}_2$ ),  $3.93$  (m, 4H,  $\text{OCH}_2\text{CH}_2$ ),  $7.12$  (m, br, 16H, *o*- and *m*-Ar-CH) and  $7.81$  (m, br, 4H, *p*-Ar-CH).  $^{13}\text{C}\{^1\text{H}\}$  NMR ( $d_6$ -benzene, 298 K):  $\delta$   $3.78$  ( $\text{NSi}(\text{CH}_3)_3$ ),  $4.86$  ( $\text{CH}_2\text{Si}(\text{CH}_3)_3$ ),  $24.92$  ( $\text{OCH}_2\text{CH}_2$ ),  $33.17$  (d,  $^1J_{\text{YC}} = 43.90$  Hz,  $\text{CH}_2\text{Si}$ ),  $60.08$  (td,  $^1J_{\text{PC}} = 131.86$  Hz,  $^1J_{\text{YC}} = 4.88$  Hz,  $\text{YCP}_2$ ),  $69.86$  ( $\text{OCH}_2\text{CH}_2$ ),  $129.14$  (Ar-C),  $131.36$  (Ar-C) and  $139.32$  (t,  $^1J_{\text{PC}} = 50.34$  Hz, *i*-Ar-C). One Ar-C resonance was obscured by the  $\text{C}_6\text{D}_6$  solvent resonance.  $^{31}\text{P}\{^1\text{H}\}$  NMR ( $d_6$ -benzene, 298 K):  $\delta$   $7.30$  (d,  $^2J_{\text{YP}} = 11.53$  Hz, NPC).

#### DFT Calculations

The calculations were performed using the Amsterdam Density Functional (ADF) suite version 2006.01.<sup>[1, 2]</sup> The restricted relativistic geometry optimization DFT calculations for **1** employed a

Slater type orbital (STO) triple- $\zeta$ -plus one polarization function basis set from the ZORA/TZP database of the ADF suite for all atoms. Frozen core basis sets were used for C (1s), N (1s), O (1s), Si (2p), P (2p) and Y (4p). Scalar relativistic (SR) approaches were used within the ZORA Hamiltonian for the inclusion of relativistic effects. The local density approximation (LDA) with the correlation potential due to Vosko *et al* was used in all of the DFT calculations.<sup>[3]</sup> Gradient corrections were performed using the functionals of Becke<sup>[4]</sup> and Perdew<sup>[5]</sup> (BP). Natural Bond Orbital analyses were performed using NBO v5<sup>[6]</sup> using the results of DFT calculations in which all electron basis sets were used as follows: ZORA/DZ for all H atoms and the C atoms pendant to the Si atoms, and ZORA/TZP for all other atoms. We chose this approach because of memory storage limitations in NBO v5. The Kohn-Sham orbitals were visualized in MOLEKEL.<sup>[7]</sup>

## References

- [1] C. Fonseca Guerra, J. G. Snijders, G. te Velde, E. J. Baerends, *Theor. Chem. Acc.*, 1998, **99**, 391.
- [2] G. te Velde, F. M. Bickelhaupt, S. J. A. van Gisbergen, C. Fonseca Guerra, E. J. Baerends, J. G. Snijders, T. Ziegler, *J. Comput. Chem.*, 2001, **22**, 931.
- [3] S. H. Vosko, L. Wilk, M. Nusair, *Can. J. Phys.*, 1980, **58**, 1200.
- [4] A. D. Becke, *Phys. Rev. A*, 1988, **38**, 3098.
- [5] J. P. Perdew, *Phys. Rev. B*, 1986, **33**, 8822.
- [6] E. D. Glendening, J. K. Badenhoop, A. E. Reed, J. E. Carpenter, J. A. Bohmann, C. M. Morales, Weinhold, F. *NBO 5.0.*; Theoretical Chemistry Institute, University of Wisconsin: Madison 2001.
- [7] P. Flükiger, H. P. Lüthi, S. Portmann, J. Weber, *MOLEKEL 4.0 Swiss Center for Scientific Computing, Manno (Switzerland)*, 2000.

**Optimized Geometry for 1**

|    |          |          |          |
|----|----------|----------|----------|
| Y  | 0.00000  | 0.00000  | 0.00000  |
| O  | 2.42010  | 0.00000  | 0.00000  |
| C  | 2.92110  | 1.36580  | 0.00000  |
| C  | 3.88870  | 1.46260  | -1.16200 |
| C  | 3.54670  | 0.24470  | -2.00070 |
| C  | 3.20510  | -0.75630 | -0.93580 |
| C  | -0.12540 | 1.81960  | -1.53340 |
| C  | -1.57120 | 4.58240  | -1.56640 |
| C  | 1.47810  | 4.42420  | -1.59330 |
| C  | -0.08630 | 3.73490  | 0.89930  |
| H  | 4.10970  | -1.13810 | -0.42480 |
| H  | 2.59940  | -1.60990 | -1.27730 |
| H  | 2.65150  | 0.43910  | -2.61890 |
| H  | 4.36580  | -0.08390 | -2.65730 |
| H  | 3.76900  | 2.41060  | -1.70970 |
| H  | 4.93020  | 1.40050  | -0.80660 |
| H  | 2.04490  | 2.02820  | -0.13790 |
| H  | 3.38260  | 1.56430  | 0.97950  |
| H  | -1.63080 | 4.60860  | -2.66790 |
| H  | -2.50210 | 4.12450  | -1.18740 |
| H  | -1.53410 | 5.62090  | -1.19300 |
| H  | 2.38820  | 3.93500  | -1.20100 |
| H  | 1.53260  | 4.40060  | -2.69580 |
| H  | 1.51170  | 5.48020  | -1.27280 |
| H  | -0.10150 | 4.79350  | 1.21490  |
| H  | -0.97710 | 3.24190  | 1.33310  |
| H  | 0.80380  | 3.26630  | 1.35930  |
| H  | -1.16270 | 1.58150  | -1.86060 |
| H  | 0.51960  | 1.70350  | -2.43060 |
| Si | -0.09220 | 3.58310  | -0.97770 |
| N  | -0.78540 | 0.27940  | 2.13690  |
| N  | -0.44810 | -2.02840 | -0.97560 |
| P  | -2.34470 | 0.00330  | 1.69680  |
| P  | -2.06710 | -1.87720 | -0.71290 |
| C  | -2.34660 | -0.43420 | 0.08130  |
| C  | 1.66710  | -4.05900 | -1.08100 |
| C  | 1.08620  | -2.19380 | -3.48970 |
| C  | -0.75420 | -4.46750 | -2.77670 |
| C  | -2.69010 | -3.34750 | 0.13240  |
| C  | -1.81690 | -4.34600 | 0.54330  |
| C  | -2.29060 | -5.44420 | 1.24370  |
| C  | -3.64130 | -5.54520 | 1.54010  |
| C  | -4.51640 | -4.54190 | 1.14530  |
| C  | -4.04380 | -3.44450 | 0.44640  |
| C  | -2.84390 | -1.91160 | -2.35300 |
| C  | -3.74140 | -2.88770 | -2.76870 |
| C  | -4.22590 | -2.88240 | -4.06920 |
| C  | -3.81360 | -1.90700 | -4.96260 |
| C  | -2.91920 | -0.92600 | -4.55110 |

Supplementary Material (ESI) for Chemical Communications  
This journal is (c) The Royal Society of Chemistry 2008

|    |          |          |          |
|----|----------|----------|----------|
| C  | -2.43960 | -0.92760 | -3.25370 |
| C  | -3.28380 | 1.53900  | 1.90850  |
| C  | -3.70210 | 1.97350  | 3.16220  |
| C  | -4.33920 | 3.19550  | 3.29990  |
| C  | -4.56000 | 3.99220  | 2.18480  |
| C  | -4.15050 | 3.55950  | 0.93170  |
| C  | -3.51780 | 2.33400  | 0.79350  |
| C  | -3.16230 | -1.14120 | 2.83440  |
| C  | -4.54370 | -1.08780 | 3.00930  |
| C  | -5.18150 | -2.01950 | 3.81130  |
| C  | -4.44690 | -3.01820 | 4.43530  |
| C  | -3.07400 | -3.08760 | 4.24810  |
| C  | -2.43380 | -2.15260 | 3.45030  |
| C  | 1.81660  | 1.11150  | 3.12660  |
| C  | 0.00230  | -0.48230 | 4.92750  |
| C  | -0.60160 | 2.41890  | 4.29560  |
| Si | 0.34020  | -3.13900 | -2.05280 |
| Si | 0.01760  | 0.81230  | 3.57610  |
| H  | 1.18980  | -4.85400 | -0.48020 |
| H  | 2.38230  | -4.55410 | -1.76140 |
| H  | 2.23920  | -3.42600 | -0.38140 |
| H  | 1.67420  | -2.85770 | -4.14720 |
| H  | 0.25420  | -1.77510 | -4.08580 |
| H  | 1.73130  | -1.34960 | -3.18980 |
| H  | -1.45810 | -4.06770 | -3.52750 |
| H  | -0.11150 | -5.21950 | -3.27030 |
| H  | -1.34390 | -4.98400 | -1.99820 |
| H  | -4.72480 | -2.63860 | 0.14640  |
| H  | -5.58000 | -4.61160 | 1.39440  |
| H  | -4.01790 | -6.41210 | 2.09280  |
| H  | -1.59830 | -6.22990 | 1.56250  |
| H  | -0.75010 | -4.23910 | 0.31300  |
| H  | -1.73040 | -0.15540 | -2.92430 |
| H  | -2.59370 | -0.15020 | -5.25130 |
| H  | -4.19230 | -1.90800 | -5.98960 |
| H  | -4.92860 | -3.65800 | -4.38890 |
| H  | -4.05190 | -3.67390 | -2.07050 |
| H  | -3.20120 | 1.94680  | -0.18550 |
| H  | -4.33070 | 4.18460  | 0.05080  |
| H  | -5.06390 | 4.95800  | 2.29380  |
| H  | -4.66860 | 3.53140  | 4.28840  |
| H  | -3.54000 | 1.33530  | 4.03930  |
| H  | -1.34810 | -2.18960 | 3.30510  |
| H  | -2.49300 | -3.87730 | 4.73480  |
| H  | -4.95000 | -3.75080 | 5.07520  |
| H  | -6.26500 | -1.96210 | 3.95500  |
| H  | -5.11910 | -0.29490 | 2.51720  |
| H  | 2.27190  | 0.27190  | 2.56970  |
| H  | 1.91820  | 2.03290  | 2.52640  |
| H  | 2.40220  | 1.25900  | 4.05110  |
| H  | -1.02230 | -0.73130 | 5.25330  |

Supplementary Material (ESI) for Chemical Communications  
This journal is (c) The Royal Society of Chemistry 2008

|   |          |          |         |
|---|----------|----------|---------|
| H | 0.48740  | -1.41770 | 4.59920 |
| H | 0.55750  | -0.10140 | 5.80320 |
| H | -1.61540 | 2.34220  | 4.72150 |
| H | 0.08400  | 2.73740  | 5.10160 |
| H | -0.62040 | 3.20850  | 3.52370 |
